# Supplementary material for: Effect of Stabilizers on Encapsulation Efficiency and Release Behavior of Exenatide-Loaded PLGA Microsphere Prepared by the W/O/W Solvent Evaporation Method
Source: MDPI journal article supplement (doi:10.3390/pharmaceutics11120627), 2019-11-24
Supplement: s1 [file s1]

**Figure S1.** Chemical structures: (a) exenatide; (b) PLGA; (c) sucrose; (d) proline; (e) lysine; (f) phenylalanine; (g) poloxamer 188.

**(a) Aqueous solution stability of exenatide**

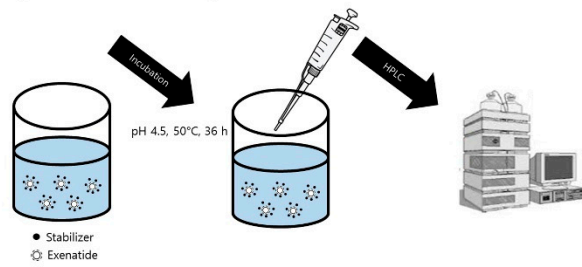

**(b) W/O interface-induced stability**

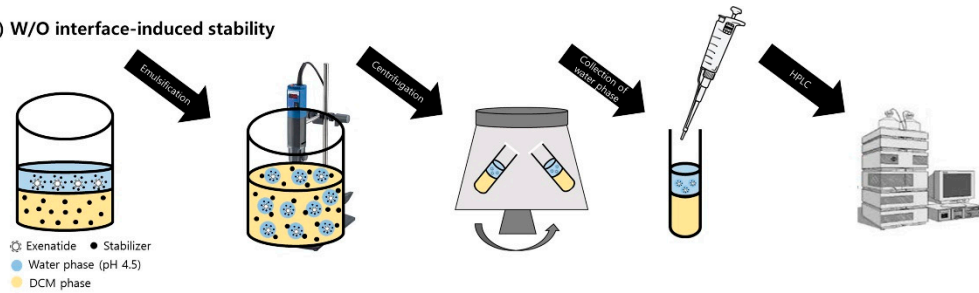

**(c) Freeze-thawing stability**

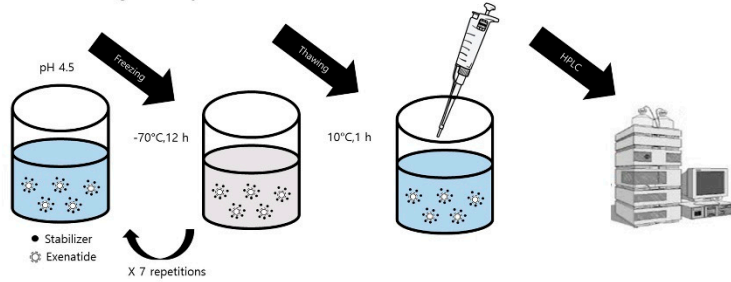

**(d) Freeze-drying stability**

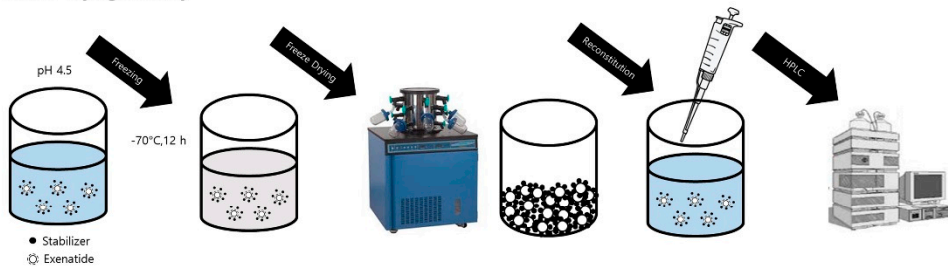

**(e) Adsorption**

Hydrophilic additives in aqueous phase

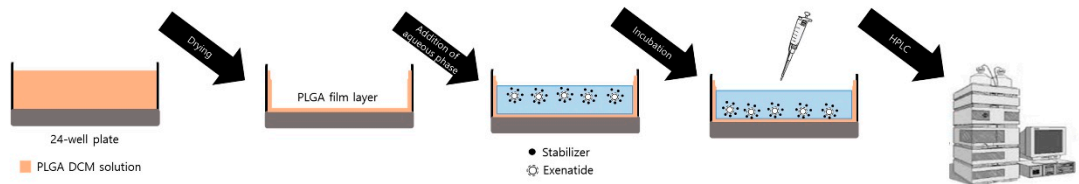

Amphipathic additives in DCM phase

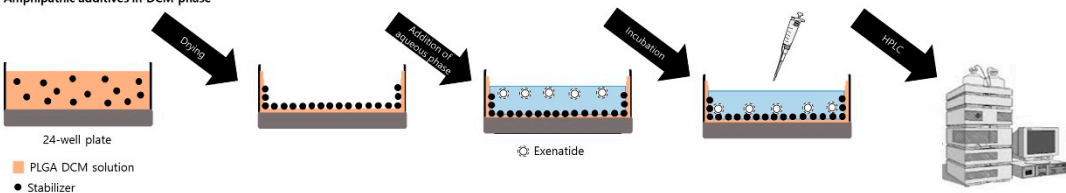

**Figure S2.** Schematic representation of stability test methods: (a) aqueous solution stability; (b) W/O interface-induced stability; (c) freeze-thawing stability; (d) freeze-drying stability; (e) adsorption.
